# Supplementary material for: Characterization of Streptomyces sp. KB1 and its cultural optimization for bioactive compounds production
Source: PeerJ. 2023 Feb 24;11:e14909. doi: 10.7717/peerj.14909 (PMC9969850; doi:10.7717/peerj.14909)
Supplement: Supplemental Information 1 — The average and SD of antimicrobial activity [file peerj-11-14909-s001.xlsx]

## Sheet: Table5
raw data	Table5
Formula	1	2	3	Mean	SD
LB	23	23	23	23	0
LB/2	23	23	23	23	0
LB/3	21	20	21	20.6667	0.57735
LB/4	18	19	18	18.3333	0.57735
LB/5	16	16	15	15.6667	0.57735
LB/6	13	12	12	12.3333	0.57735
inoculum	1	2	3	Mean	SD
0.5	16	17	17	16.6667	0.57735
1	23	23	23	23	0
2	23	23	23	23	0
3	23	23	23	23	0
4	23	23	24	23.3333	0.57735
5	24	23	23	23.3333	0.57735

## Sheet: Table6
raw data		Table6
	50/250							100/500							200/1000
25C	1	2	3	Mean	SD		25C	1	2	3	Mean	SD		25C	1	2	3	Mean	SD
1	0	0	0	0	0		1	0	0	0	0	0		1	0	0	0	0	0
2	0	0	0	0	0		2	0	0	0	0	0		2	0	0	0	0	0
3	16	17	16	16.3333	0.57735		3	17	16	16	16.3333	0.57735		3	12	11	11	11.3333	0.57735
4	17	17	18	17.3333	0.57735		4	17	18	17	17.3333	0.57735		4	12	12	11	11.6667	0.57735
5	18	18	17	17.6667	0.57735		5	18	18	17	17.6667	0.57735		5	12	11	12	11.6667	0.57735
6	18	17	18	17.6667	0.57735		6	17	18	18	17.6667	0.57735		6	12	13	12	12.3333	0.57735
7	17	17	18	17.3333	0.57735		7	18	17	17	17.3333	0.57735		7	12	12	12	12	0
8	18	17	17	17.3333	0.57735		8	17	17	18	17.3333	0.57735		8	12	12	12	12	0
9	17	18	17	17.3333	0.57735		9	18	17	17	17.3333	0.57735		9	12	12	12	12	0
10	17	17	17	17	0		10	17	17	17	17	0		10	12	12	12	12	0
11	17	16	16	16.3333	0.57735		11	17	16	16	16.3333	0.57735		11	11	12	12	11.6667	0.57735
12	16	17	16	16.3333	0.57735		12	17	16	16	16.3333	0.57735		12	12	11	12	11.6667	0.57735
13	16	16	16	16	0		13	16	16	16	16	0		13	12	11	12	11.6667	0.57735
14	16	15	16	15.6667	0.57735		14	16	16	15	15.6667	0.57735		14	11	11	11	11	0
30C	1	2	3	Mean	SD		30C	1	2	3	Mean	SD		30C	1	2	3	Mean	SD
1	0	0	0	0	0		1	0	0	0	0	0		1	0	0	0	0	0
2	0	0	0	0	0		2	18	18	18	18	0		2	21	21	21	21	0
3	0	0	0	0	0		3	18	19	19	18.6667	0.57735		3	21	23	22	22	1
4	15	15	16	15.3333	0.57735		4	19	18	19	18.6667	0.57735		4	24	24	23	23.6667	0.57735
5	17	16	17	16.6667	0.57735		5	19	18	19	18.6667	0.57735		5	24	23	24	23.6667	0.57735
6	16	17	17	16.6667	0.57735		6	19	19	18	18.6667	0.57735		6	24	24	23	23.6667	0.57735
7	17	16	16	16.3333	0.57735		7	19	19	19	19	0		7	23	23	24	23.3333	0.57735
8	17	18	18	17.6667	0.57735		8	19	19	19	19	0		8	23	24	24	23.6667	0.57735
9	17	17	18	17.3333	0.57735		9	19	19	19	19	0		9	23	24	24	23.6667	0.57735
10	17	18	18	17.6667	0.57735		10	19	19	19	19	0		10	23	23	24	23.3333	0.57735
11	17	18	18	17.6667	0.57735		11	19	18	19	18.6667	0.57735		11	23	24	23	23.3333	0.57735
12	16	17	17	16.6667	0.57735		12	19	19	18	18.6667	0.57735		12	23	24	23	23.3333	0.57735
13	16	16	17	16.3333	0.57735		13	18	18	19	18.3333	0.57735		13	23	24	23	23.3333	0.57735
14	16	16	16	16	0		14	18	18	19	18.3333	0.57735		14	22	23	22	22.3333	0.57735
37C	1	2	3	Mean	SD		37C	1	2	3	Mean	SD		37C	1	2	3	Mean	SD
1	0	0	0	0	0		1	0	0	0	0	0		1	0	0	0	0	0
2	0	0	0	0	0		2	0	0	0	0	0		2	0	0	0	0	0
3	0	0	0	0	0		3	0	0	0	0	0		3	0	0	0	0	0
4	0	0	0	0	0		4	0	0	0	0	0		4	0	0	0	0	0
5	0	0	0	0	0		5	0	0	0	0	0		5	0	0	0	0	0
6	0	0	0	0	0		6	0	0	0	0	0		6	0	0	0	0	0
7	0	0	0	0	0		7	0	0	0	0	0		7	0	0	0	0	0
8	0	0	0	0	0		8	0	0	0	0	0		8	0	0	0	0	0
9	0	0	0	0	0		9	0	0	0	0	0		9	0	0	0	0	0
10	0	0	0	0	0		10	0	0	0	0	0		10	0	0	0	0	0
11	0	0	0	0	0		11	0	0	0	0	0		11	0	0	0	0	0
12	0	0	0	0	0		12	0	0	0	0	0		12	0	0	0	0	0
13	0	0	0	0	0		13	0	0	0	0	0		13	0	0	0	0	0
14	0	0	0	0	0		14	0	0	0	0	0		14	0	0	0	0	0

## Sheet: Table7
raw data	Table5
Agitate	1	2	3	Mean	SD
0	0	0	0	0	0
100	17	18	17	17.3333	0.57735
150	21	21	21	21	0
200	23	23	24	23.3333	0.57735
250	22	23	23	22.6667	0.57735
pH	1	2	3	Mean	SD
5	12	11	12	11.6667	0.57735
6	20	19	19	19.3333	0.57735
7	23	23	23	23	0
8	21	22	21	21.3333	0.57735
9	18	18	18	18	0

## Sheet: Table8
raw data	Table8
Carbon	1	2	3	Mean	SD
Glucose	0	0	0	0	0
Maltose	16	16	15	15.6667	0.57735
Sucrose	14	13	15	14	1
Glycerol	19	20	19	19.3333	0.57735
Starch	21	21	20	20.6667	0.57735
No	23	23	24	23.3333	0.57735
Nitrogen	1	2	3	Mean	SD
Casein	22	23	23	22.6667	0.57735
Peptone	23	22	23	22.6667	0.57735
Beef E	21	21	22	21.3333	0.57735
Malt E	23	22	23	22.6667	0.57735
Ammonium	21	20	21	20.6667	0.57735
Urea	19	20	20	19.6667	0.57735
No	23	23	23	23	0
Salt	1	2	3	Mean	SD
0	23	23	23	23	0
0.1	23	22	24	23	1
0.5	22	23	23	22.6667	0.57735
1.0	22	20	21	21	1
1.5	19	18	18	18.3333	0.57735
2.0	15	16	14	15	1
2.5	12	11	12	11.6667	0.57735
3.0	0	0	0	0	0
trace	1	2	3	Mean	SD
Fe	0	0	0	0	0
Mg	23	22	24	23	1
Ca	23	23	23	23	0
K2	0	0	0	0	0
KH2	19	20	19	19.3333	0.57735
KCl	0	0	0	0	0
KNO	0	0	0	0	0
No	23	23	23	23	0
